# Supplementary material
Source: PubMed Central journal article supplement (PMC7984781)
Supplement: boe-12-3-1437-s001.pdf [file boe-12-3-1437-s001.pdf]

## Label-free histological imaging of tissues using Brillouin light scattering contrast: supplement

SEUNGMI RYU,<sup>1,2,5</sup> NICOLA MARTINO,<sup>1,5</sup>  SHELDON J. J. KWOK,<sup>1,3</sup> LIANE BERNSTEIN,<sup>1,4</sup> AND SEOK-HYUN YUN<sup>1,3,\*</sup>

<sup>1</sup>Harvard Medical School and Wellman Center for Photomedicine, Massachusetts General Hospital, 65 Landsdowne St., Cambridge, MA 02139, USA

<sup>2</sup>National Center for Advancing Translational Sciences, National Institute of Health, Rockville, MD 20850, USA

<sup>3</sup>Harvard-MIT Health Sciences and Technology, Massachusetts Institute of Technology, Cambridge, MA 02139, USA

<sup>4</sup>Department of Electrical Engineering and Computer Science, Massachusetts Institute of Technology, Cambridge, MA 02139, USA

<sup>5</sup>These authors contributed equally to this work

\*[syun@hms.harvard.edu](mailto:syun@hms.harvard.edu)

---

This supplement published with The Optical Society on 17 February 2021 by The Authors under the terms of the [Creative Commons Attribution 4.0 License](https://creativecommons.org/licenses/by/4.0/) in the format provided by the authors and unedited. Further distribution of this work must maintain attribution to the author(s) and the published article's title, journal citation, and DOI.

Supplement DOI: <https://doi.org/10.6084/m9.figshare.13515917>

Parent Article DOI: <https://doi.org/10.1364/BOE.414474>

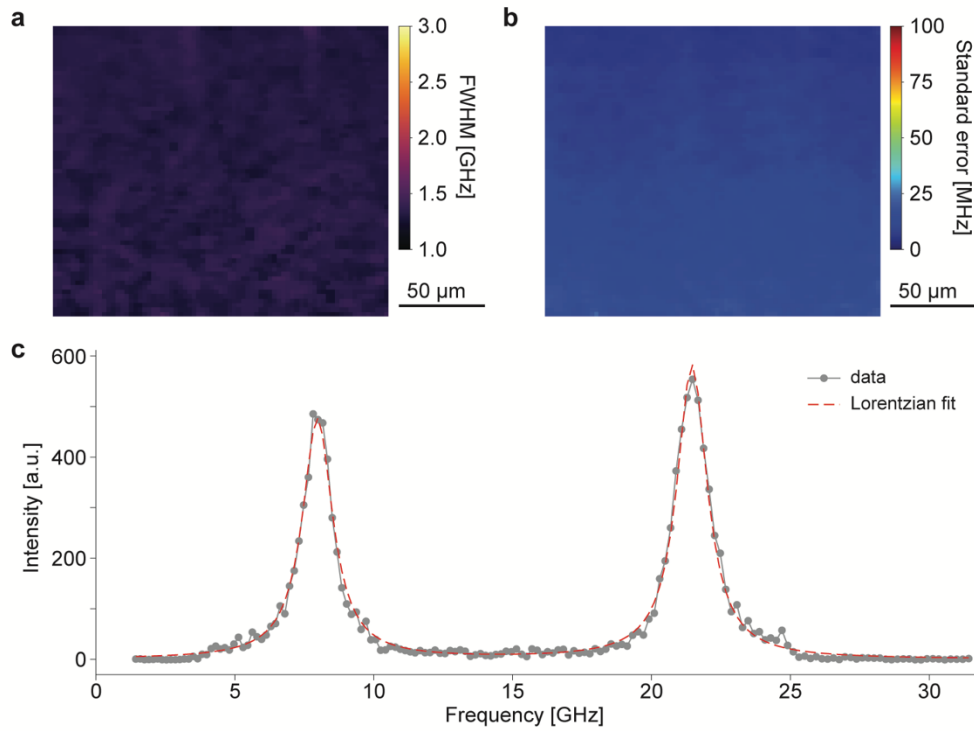

**Fig. S1.** Lorentzian fitting of muscle tissue data (from Fig. 1c). **a**, map of linewidths (FWHM) of the Brillouin peaks. **b**, map of uncertainties (reported as standard error) for the Brillouin shift values obtained from the Lorentzian fit. **c**, representative Brillouin spectrum from the muscle tissue with Lorentzian fit of the Stokes and anti-Stokes peaks (from two adjacent orders).

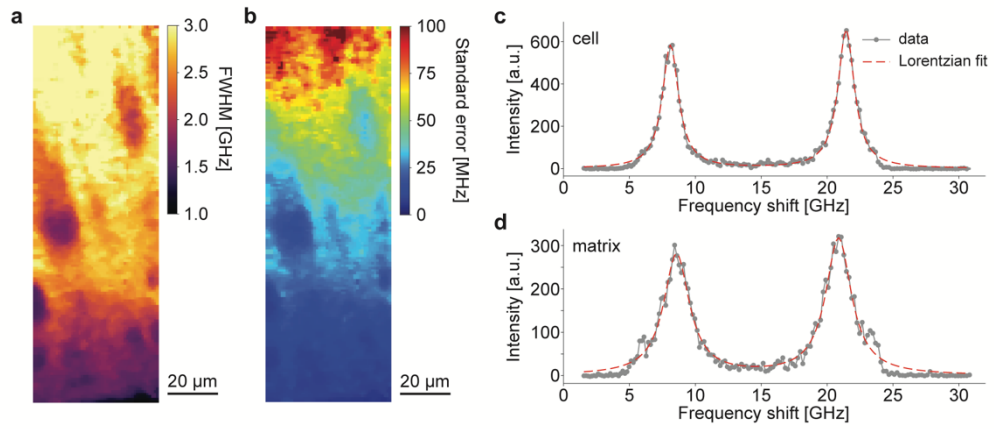

**Fig. S2.** Lorentzian fitting of cartilage tissue data (from Fig. 2d). **a**, map of linewidths (FWHM) of the Brillouin peaks. **b**, map of uncertainties (reported as standard error) for the Brillouin shift values obtained from the Lorentzian fit. **c**, **d**, representative Brillouin spectra from a cell (**c**) and the extracellular matrix (**d**) with Lorentzian fit of the Stokes and anti-Stokes peaks (from two adjacent orders).

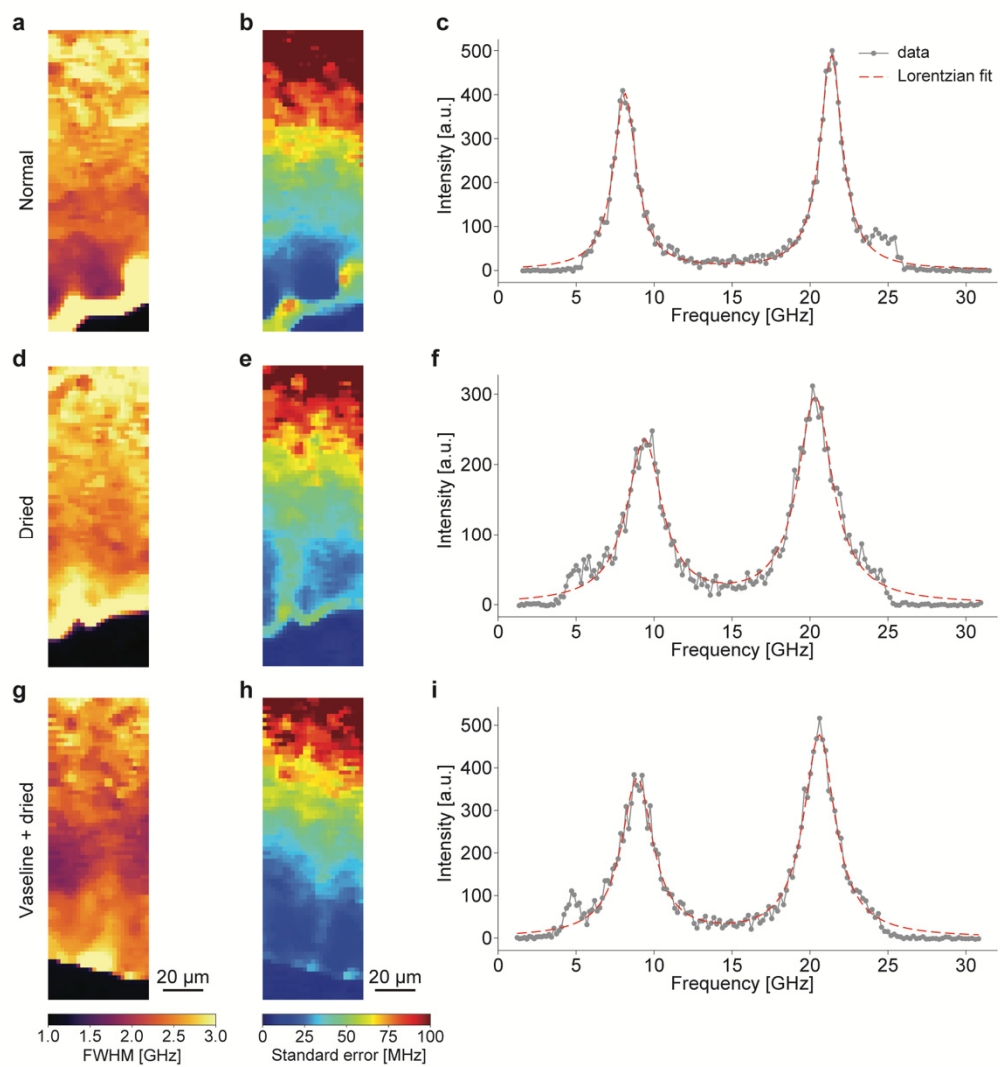

**Fig. S3.** Lorentzian fitting of skin epithelial tissue data (from Fig. 3a-c). Maps of linewidths (**a,d,g**), maps of Brillouin shift uncertainties (**b,e,h**) and representative Brillouin spectra (**j,f,i**) for normal, dried and Vaseline-treated skin epithelial tissue data, respectively.

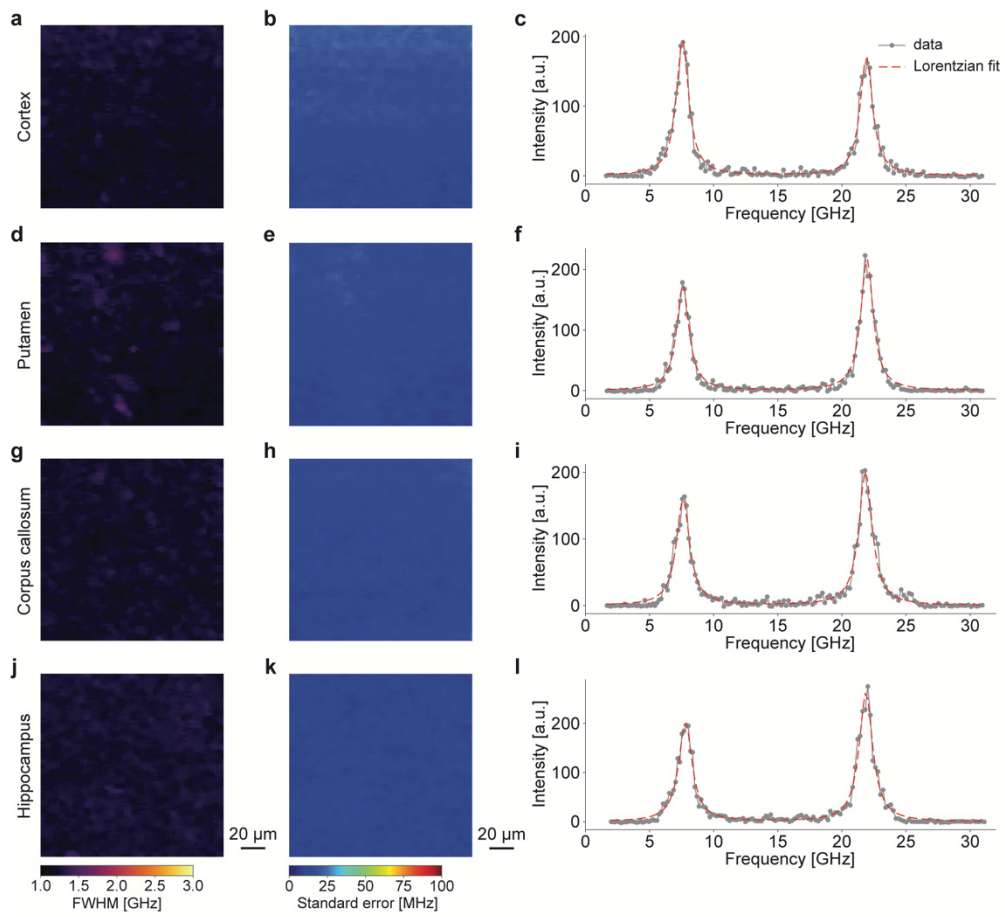

**Fig. S4.** Lorentzian fitting of brain tissue data (from Fig. 4b). Maps of linewidths (**a,d,g,j**), maps of Brillouin shift uncertainties (**b,e,h,k**) and representative Brillouin spectra (**j,f,l,l**) for cortex, putamen, corpus callosum, and hippocampus data, respectively.
